# Supplementary material for: BMAP-27 Peptide Reduces Proliferation and Increases Apoptosis in Primary and Metastatic Colon Cancer Cell Lines
Source: Preprints.org preprint supplement (doi:10.20944/preprints202308.0232.v1), 2023-08-02
Supplement: Supplementary file 1 [file supplementary]

# NATIONAL CENTRE FOR CELL SCIENCE, PUNE

राष्ट्रीय कोशिका विज्ञान केन्द्र, पुणे

## Cell Line Authentication Report

**Job No:** 16

**Name of Cell Line:** SW-620 PN14

### **Methodology:**

Sixteen short tandem repeat (STR) loci were amplified using commercially available AmpFISTR® Identifiler® Plus PCR Amplification Kit from Applied Bio systems. The cell line sample was processed using the Applied Bio systems® 3500 Genetic Analyser. Data was analysed using Gene Mapper® ID-X v1.5 software (Applied Biosystems). Appropriate positive and negative controls were used and confirmed for each sample.

### **STR Profile:**

D5S818: 13  
D7S820: 8, 9  
D13S317: 12  
D16S539: 9, 13  
CSF1PO: 13, 14  
TH01: 8  
TPOX: 11  
vWA: 16  
Amelogenin: X  
D21S11: 30, 30.2  
D81179: 13  
D3S1358: 16  
D2S1338: 17, 24  
D19S433: 13  
D18S51: 13  
FGA: 24

Percent match between tested cell line sample and ATCC STR profile database: 100%

*p. nagvenkar*  
9-2-18

Dr. Punam Nagvenkar  
Scientist  
Cell Repository

**CELL REPOSITORY**  
National Centre for Cell Science,  
S.P. Pune University Campus,  
Ganeshkhind, Pune - 411 007.

# NATIONAL CENTRE FOR CELL SCIENCE, PUNE

राष्ट्रीय कोशिका विज्ञान केन्द्र, पुणे

## Cell Line Authentication Report

Job No: 16

Name of Cell Line: SW-480 P34

### **Methodology:**

Sixteen short tandem repeat (STR) loci were amplified using commercially available AmpFISTR® Identifier® Plus PCR Amplification Kit from Applied Bio systems. The cell line sample was processed using the Applied Bio systems® 3500 Genetic Analyser. Data was analysed using Gene Mapper® ID-X v1.5 software (Applied Biosystems). Appropriate positive and negative controls were used and confirmed for each sample.

### **STR Profile:**

D5S818: 13  
D7S820: 8  
D13S317: 12  
D16S539: 13  
CSF1PO: 13, 14  
TH01: 8  
TPOX: 11  
vWA: 16  
Amelogenin: X  
D21S11: 30, 30.2  
D81179: 13  
D3S1358: 15  
D2S1338: 17, 24  
D19S433: 13  
D18S51: 13  
FGA: 24

Percent match between tested cell line sample and ATCC STR profile database: 100%

*P. Nagvenkar*  
19-1-2018  
Dr. Punam Nagvenkar  
Scientist  
Cell Repository

**CELL REPOSITORY**  
National Centre for Cell Science,  
S.P. Pune University Campus,  
Ganeshkhind, Pune - 411 007.
